# Supplementary material
Source: PubMed Central journal article supplement (PMC2507887)
Supplement: NIHMS60865-supplement-si20050817_071.pdf [file NIHMS60865-supplement-si20050817_071.pdf]

# Alteration of the Regiospecificity of Human Heme Oxygenase-1 by Unseating of the Heme but not Disruption of the Distal Hydrogen Bonding Network

Jinling Wang, John P. Evans, Hiroshi Ogura,<sup>§</sup> Gerd N. La Mar,<sup>§</sup> and Paul R. Ortiz de Montellano\*

*Department of Pharmaceutical Chemistry, University of California, 600 16<sup>th</sup> Street, San Francisco, California 94143-2280 and <sup>§</sup>Department of Chemistry, University of California, Davis, California 95616*

**Supporting Information :** One Table (chemical shift for assigned residues) and one figure (TOCSY spectra).

**Table S1:** Chemical Shift for Assigned Residues in K18E/E29K/R183E-hHO1-PH-CN and Wild-type hHO1-PH-CN<sup>a</sup>

|        |                           | mutant | wild-type |                           |               | mutant | wild-type |
|--------|---------------------------|--------|-----------|---------------------------|---------------|--------|-----------|
| Lys22  | C $\alpha$ H              | 6.37   | 6.18      | Ser142                    | C $\alpha$ H  | 2.79   | 2.66      |
|        | C $\beta$ H               | 3.08   | 3.00      |                           | C $\beta$ 1H  | -2.47  | -3.35     |
|        | C $\gamma$ H              | 2.92   | 2.82      |                           | C $\beta$ 2H  | -3.37  | -5.25     |
| His25  | C H                       | 9.07   | 9.24      | Leu164                    | C $\alpha$ H  | 5.45   | 5.37      |
|        | C $\beta$ 2H              | 12.04  | 9.99      |                           | Ala165        | NH     | 12.03     |
|        | C $\alpha$ H              | 4.20   | 4.01      | C $\alpha$ H              |               | 4.03   | 3.98      |
| Ala28  | C $\alpha$ Hs             | -2.15  | -2.25     | C $\alpha$ H <sub>3</sub> |               | 1.54   | 1.49      |
|        | C $\beta$ H               | 2.45   | 2.25      | Phe166                    | NH            | 11.62  | 11.56     |
| Phe47  | C $\alpha$ Hs             | 6.30   | 6.41      |                           | C $\alpha$ Hs | 5.90   | 5.89      |
|        | C $\beta$ Hs              | 7.06   | 7.59      |                           | C $\beta$ Hs  | 6.72   | 6.78      |
|        | C $\gamma$ H              | 7.18   | 7.68      |                           | C $\gamma$ H  | 8.12   | 8.18      |
| Tyr58  | NH                        | 9.12   | 9.11      | Phe167                    | C $\alpha$ H  | 8.16   | 8.19      |
|        | C $\alpha$ H              | 7.88   | 7.83      |                           | C $\beta$ H   | 8.77   | 8.77      |
|        | C $\alpha$ Hs             | 7.22   | 7.04      |                           | C $\gamma$ H  | 8.11   | 8.11      |
| Phe95  | C $\alpha$ Hs             | 6.05   | 5.97      | Phe207                    | C $\alpha$ Hs | 5.27   | 6.50      |
|        | C $\beta$ H               | 6.19   | 6.13      |                           | C $\beta$ Hs  | 6.13   | 5.85      |
|        | C $\gamma$ H              | 6.75   | 6.69      |                           | C $\gamma$ H  | 8.10   | -         |
| Tyr134 | C $\alpha$ Hs             | 6.77   | 6.71      | Phe214                    | C $\alpha$ Hs | 6.41   | 6.62      |
|        | C $\beta$ Hs              | 6.60   | 6.45      |                           | C $\beta$ Hs  | 6.54   | 6.95      |
| Thr135 | C $\alpha$ H              | 2.41   | 2.65      |                           | C $\gamma$ H  | 7.06   | 7.78      |
|        | C $\beta$ H               | 3.25   | 3.10      |                           |               |        |           |
|        | C $\alpha$ H <sub>3</sub> | -0.51  | 0.01      |                           |               |        |           |

a) Chemical shifts in ppm, referenced to DSS, in <sup>2</sup>H<sub>2</sub>O solution, 60 mM in phosphate, pH 7.2 at 25°C.

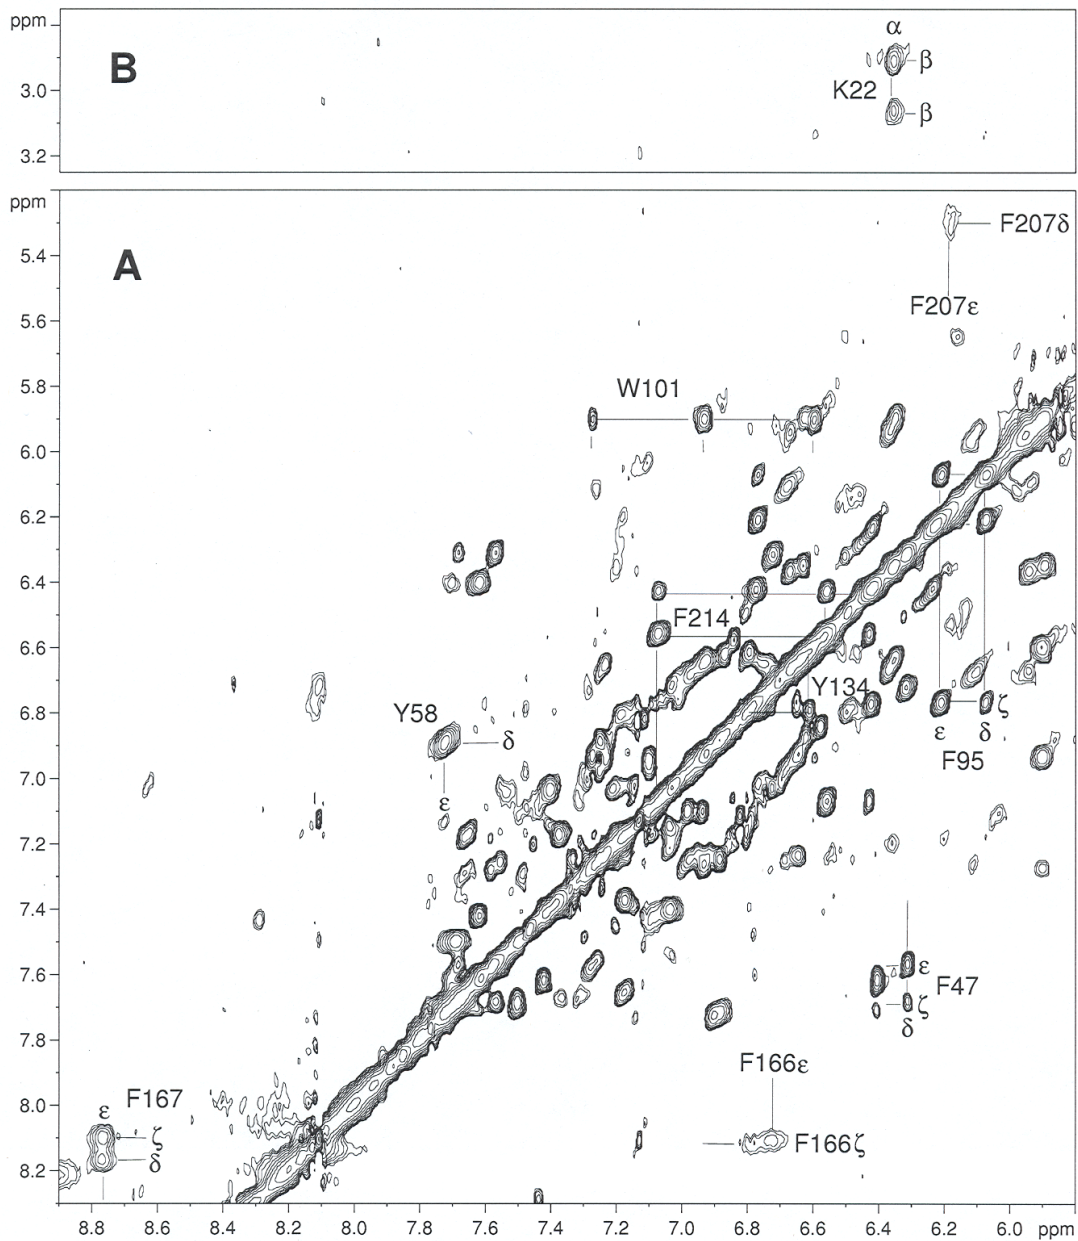

**Figure S1:** Portion of the 600 MHz <sup>1</sup>H NMR TOCSY spectrum (mixing time 25 ms, repetition rate 2 s<sup>-1</sup>) of K18E/E29K/R183E-hHO1-PH-CN in <sup>2</sup>H<sub>2</sub>O 60 mM in phosphate, pH 7.2 at 25°C illustrating the scalar connectivities for (A) aromatic residues Phe47, Tyr58, Phe95, Trp101, Tyr134, Phe166, Phe167, Phe207 and Phe214, and (B) the

strongly low-field dipolar-shifted Lys22. Cross peaks are labeled by one-letter code for residue, residue number and proton position.
